# Supplementary material
Source: publisher figshare collection journal article supplement (https://geolsoc.figshare.com/ndownloader/files/10380180)
Supplement: Supplementary file 1 [file 10380180]

## Sheet: Ark1
	LA-ICP-MS line analysis of U-Pb concentration in zircons - samples EST_12 and EST_112
	Isotope ratios - Concordia output						Age estimates (Ma)								Concentrations
Analysis_#	Pb207 U235	1s%	Pb206 U238	1s%	roh		Pb207 Pb206	1s	Pb207 U235	1s	Pb206 U238	1s	conc		Th/U	U	Th	Pbtot		Core/Rim	grey analyses are omitted from final age calculation
EST12_001	0.6789	1.49	0.08465	1.03	0.69		536	24	526	6.1	524	5.2	98		0.4	1286	512	128		Core	detector switched to analogue mode, U/Pb not reliable
EST12_004	0.6311	1.51	0.07899	1.03	0.68		529	25	497	5.9	490	4.8	93		0.45	842	379	79		Core
EST12_005	0.6491	1.49	0.08197	1.02	0.69		509	23	508	5.9	508	5	100		0.49	1428	702	141		Core	detector switched to analogue mode, U/Pb not reliable
EST12_006	0.6371	1.56	0.08004	1.02	0.66		520	26	501	6.1	496	4.9	95		0.33	952	313	89		Core
EST12_008	0.6856	1.5	0.0867	1.03	0.68		506	24	530	6.2	536	5.3	106		0.37	1261	469	127		Core	detector switched to analogue mode, U/Pb not reliable
EST12_009	0.6441	1.53	0.0794	0.99	0.65		561	25	505	6	493	4.7	88		0.41	1068	434	101		Core	detector switched to analogue mode, U/Pb not reliable
EST12_012	0.6662	1.54	0.0842	1	0.65		506	26	518	6.2	521	5	103		0.39	1548	610	154		Core	detector switched to analogue mode, U/Pb not reliable
EST12_013	0.6616	1.54	0.08326	1	0.65		515	25	516	6.2	516	5	100		0.44	1006	440	100		Core	detector switched to analogue mode, U/Pb not reliable
EST12_014	0.656	1.53	0.08225	1	0.65		523	25	512	6.1	510	4.9	97		0.49	1558	766	156		Core	detector switched to analogue mode, U/Pb not reliable
EST12_015	0.6388	1.55	0.08112	1	0.64		495	26	502	6.1	503	4.8	102		0.39	1116	432	106		Core	detector switched to analogue mode, U/Pb not reliable
EST12_016	0.6111	1.56	0.0786	0.99	0.64		466	27	484	6	488	4.7	105		0.34	676	229	62		Core
EST12_019	0.6167	1.56	0.07764	0.99	0.64		514	26	488	6	482	4.6	94		0.43	836	363	77		Core
EST12_022	0.6247	1.57	0.07984	0.99	0.63		480	27	493	6.1	495	4.7	103		0.36	1076	391	100		Core	detector switched to analogue mode, U/Pb not reliable
EST12_023	0.6598	1.55	0.08212	0.99	0.63		539	27	515	6.3	509	4.8	94		0.4	1355	542	132		Core	detector switched to analogue mode, U/Pb not reliable
EST12_025	0.6409	1.56	0.0801	0.99	0.63		530	27	503	6.2	497	4.7	94		0.57	2057	1168	203		Core	detector switched to analogue mode, U/Pb not reliable
EST12_002	0.6495	1.98	0.07999	1.08	0.54		564	36	508	7.9	496	5.1	88		0.19	84	16	8		Rim	>10% discordant
EST12_003	0.6215	2.84	0.07626	1.18	0.42		572	55	491	11	474	5.4	83		0.19	62	12	5		Rim	>10% discordant
EST12_007	0.6202	2.12	0.07764	1.08	0.51		528	40	490	8.2	482	5	91		0.18	69	12	6		Rim
EST12_010	0.6358	1.81	0.07947	1.03	0.57		530	33	500	7.1	493	4.9	93		0.51	280	143	27		Rim
EST12_011	0.6017	1.96	0.07715	1.04	0.53		474	37	478	7.4	479	4.8	101		0.19	93	18	8		Rim
EST12_017	0.5941	2.14	0.07786	1.05	0.49		425	40	474	8.1	483	4.9	114		0.21	80	17	7		Rim
EST12_018	0.5913	2.02	0.07736	1.03	0.51		429	38	472	7.6	480	4.8	112		0.31	148	46	13		Rim
EST12_020	0.6068	2.12	0.07632	1.05	0.5		516	40	482	8.1	474	4.8	92		0.18	116	21	10		Rim
EST12_021	0.5978	2.07	0.07706	1.04	0.5		462	40	476	7.8	479	4.8	104		0.24	109	26	9		Rim
EST12_024	0.6384	2.74	0.07948	1.13	0.41		538	55	501	10.8	493	5.4	92		0.23	90	21	8		Rim
EST112_001	5.278	1.5	0.32078	0.81	0.54		1946	23	1865	12.8	1794	12.7	92		0.85	39	33	19
EST112_002	1.6844	1.46	0.16419	0.77	0.53		1052	25	1003	9.3	980	7.1	93		0.31	142	44	28
EST112_003	0.5313	1.53	0.06869	0.77	0.5		456	29	433	5.4	428	3.2	94		0.67	388	258	36
EST112_004	0.53	1.39	0.06859	0.76	0.55		454	25	432	4.9	428	3.2	94		0.67	771	519	70
EST112_005	2.017	1.34	0.18611	0.76	0.56		1162	22	1121	9.1	1100	7.7	95		0.18	571	102	123
EST112_006	1.9584	1.32	0.18334	0.76	0.57		1133	22	1101	8.9	1085	7.6	96		0.58	467	269	114
EST112_007	0.5199	1.74	0.06706	0.81	0.46		461	34	425	6	418	3.2	91		0.57	274	157	24
EST112_008	4.9705	1.33	0.30594	0.76	0.57		1924	19	1814	11.2	1721	11.5	89		0.18	225	41	82
EST112_009	1.965	1.38	0.18395	0.77	0.56		1134	22	1104	9.3	1089	7.7	96		0.43	201	86	46
EST112_010	1.8172	1.4	0.17341	0.77	0.55		1095	23	1052	9.1	1031	7.3	94		1.26	166	210	46
EST112_011	12.1936	1.36	0.45982	0.78	0.57		2762	18	2619	12.7	2439	15.9	88		0.58	194	111	125
EST112_012	0.5281	1.51	0.06805	0.78	0.51		463	29	431	5.3	424	3.2	92		0.91	829	750	80
EST112_013	2.2729	1.33	0.20318	0.76	0.57		1225	21	1204	9.4	1192	8.3	97		0.66	584	386	160
EST112_014	1.8784	1.33	0.18136	0.76	0.57		1072	22	1074	8.8	1074	7.5	100		0.66	727	478	175
EST112_015	1.4613	2	0.15346	0.85	0.43		900	37	915	12	920	7.3	102		1.06	26	28	6
EST112_016	0.5823	1.41	0.07439	0.77	0.54		482	26	466	5.2	463	3.4	96		0.73	535	392	54
EST112_017	3.6111	2.05	0.25282	0.94	0.46		1689	33	1552	16.2	1453	12.2	86		1.74	16	28	7
EST112_018	1.9999	1.38	0.18553	0.77	0.55		1151	23	1116	9.3	1097	7.8	95		0.54	282	153	67
EST112_019	0.5551	1.43	0.07176	0.77	0.53		456	26	448	5.2	447	3.3	98		0.75	609	456	59
EST112_020	1.631	1.42	0.16177	0.77	0.54		1017	24	982	8.9	967	6.9	95		0.22	526	116	99
EST112_021	2.104	1.44	0.19273	0.78	0.54		1176	24	1150	9.9	1136	8.1	97		0.34	145	50	34
EST112_022	0.5656	1.62	0.07374	0.79	0.48		437	31	455	5.9	459	3.5	105		0.28	411	116	35
EST112_023	0.5774	1.57	0.07369	0.79	0.5		484	30	463	5.8	458	3.5	95		0.23	297	67	25
EST112_024	2.6141	1.78	0.21875	0.85	0.47		1353	30	1305	13	1275	9.8	94		0.88	18	16	6
EST112_025	1.4292	1.53	0.14748	0.79	0.52		937	27	901	9.1	887	6.5	95		0.39	124	48	22
EST112_026	0.6263	1.42	0.08071	0.77	0.54		463	26	494	5.5	500	3.7	108		0.67	1737	1165	184
EST112_027	4.0979	1.5	0.28869	1.03	0.68		1679	20	1654	12.2	1635	14.8	97		0.5	279	139	100
EST112_028	0.5874	1.51	0.07462	1.02	0.67		496	25	469	5.7	464	4.6	94		1.06	778	823	80
EST112_029	0.5921	1.65	0.07585	1.03	0.62		477	29	472	6.2	471	4.7	99		0.51	460	233	42
EST112_030	1.9805	1.57	0.18849	1.03	0.66		1101	24	1109	10.5	1113	10.5	101		0.38	114	43	25
EST112_031	1.5848	1.85	0.1603	1.06	0.57		979	31	964	11.5	959	9.5	98		0.35	29	10	5
EST112_032	0.5586	1.64	0.07132	1.02	0.62		484	29	451	6	444	4.4	92		0.6	414	249	37
EST112_033	3.1829	1.55	0.25448	1.03	0.66		1441	22	1453	11.9	1462	13.4	101		0.41	174	71	53
EST112_034	0.5718	1.85	0.07196	1.04	0.56		516	34	459	6.8	448	4.5	87		0.7	142	100	13
EST112_035	2.1256	1.52	0.19592	1.02	0.67		1166	22	1157	10.5	1153	10.8	99		0.42	167	70	40
EST112_036	11.9432	1.44	0.45184	1.02	0.7		2758	17	2600	13.4	2403	20.4	87		0.58	314	181	193
EST112_037	3.5989	1.48	0.27387	1.02	0.69		1535	20	1549	11.7	1560	14.1	102		0.5	190	96	65
EST112_038	0.5517	1.6	0.07193	1.03	0.64		439	27	446	5.7	448	4.4	102		0.65	429	281	39
EST112_039	1.9375	1.47	0.18569	1.02	0.69		1088	21	1094	9.8	1098	10.3	101		0.32	480	153	104
EST112_040	2.0626	1.51	0.19265	1.02	0.68		1139	22	1137	10.3	1136	10.6	100		0.64	253	163	62
EST112_041	10.3284	1.61	0.46564	1.07	0.66		2466	20	2465	14.8	2464	21.8	100		0.52	35	18	21
EST112_042	0.5835	1.58	0.07427	1.02	0.65		492	27	467	5.9	462	4.6	94		0.75	505	376	48
EST112_043	1.8127	1.49	0.18006	1.02	0.68		1016	22	1050	9.7	1067	10	105		0.3	272	83	57
EST112_044	0.6088	1.93	0.07862	1.06	0.55		459	36	483	7.4	488	5	106		0.15	178	26	15
EST112_045	4.9392	1.46	0.31384	1.01	0.69		1867	19	1809	12.3	1760	15.6	94		0.52	314	162	124
EST112_046	3.3001	1.47	0.25634	1.01	0.69		1497	20	1481	11.4	1471	13.4	98		0.41	266	108	83
EST112_047	1.7881	1.52	0.17361	1.02	0.67		1062	22	1041	9.8	1032	9.7	97		0.55	208	114	45
EST112_048	2.3129	1.53	0.20911	1.02	0.67		1204	22	1216	10.8	1224	11.4	102		1.6	145	232	47
EST112_049	3.4456	1.48	0.26793	1.02	0.68		1495	20	1515	11.6	1530	13.9	102		0.74	241	179	84
EST112_050	1.9819	1.52	0.18675	1.02	0.67		1122	22	1109	10.2	1104	10.3	98		0.53	230	122	53
EST112_051	0.5474	2.12	0.07127	1.07	0.5		442	40	443	7.6	444	4.6	100		0.66	140	93	13
EST112_052	4.5373	1.52	0.30951	1.02	0.67		1738	20	1738	12.6	1738	15.6	100		0.47	164	76	64
EST112_053	4.1367	1.55	0.29938	1.03	0.66		1629	21	1662	12.6	1688	15.3	104		1	62	62	25
EST112_054	0.5336	1.79	0.07122	1.04	0.58		386	32	434	6.3	444	4.4	115		0.43	162	70	14
EST112_055	0.574	1.9	0.07433	1.05	0.55		454	35	461	7	462	4.7	102		0.51	226	116	20
EST112_056	2.359	1.49	0.21077	1.02	0.68		1227	21	1230	10.6	1233	11.4	100		0.33	253	83	63
EST112_057	4.527	1.48	0.30966	1.01	0.69		1733	20	1736	12.2	1739	15.5	100		0.37	171	63	64
EST112_058	2.6553	1.49	0.22285	1.01	0.68		1349	21	1316	10.9	1297	11.9	96		0.63	241	151	68
EST112_059	2.222	1.49	0.20329	1.01	0.68		1180	21	1188	10.4	1193	11	101		0.35	268	95	64
EST112_060	0.5642	1.72	0.07151	1.02	0.59		501	30	454	6.3	445	4.4	89		0.77	175	135	16
EST112_061	0.559	1.56	0.07286	1.02	0.65		440	26	451	5.7	453	4.4	103		0.9	770	693	75
EST112_062	0.6375	1.94	0.07924	1.05	0.54		544	35	501	7.6	492	5	90		0.36	148	54	14
EST112_063	1.5461	1.63	0.15832	1.02	0.63		954	26	949	10	947	9	99		0.79	98	78	20
EST112_064	2.3571	1.48	0.2094	1.01	0.68		1238	21	1230	10.5	1226	11.3	99		0.18	377	70	90
EST112_065	0.6008	1.58	0.07674	1.02	0.64		484	27	478	6	477	4.7	99		0.18	372	67	32
EST112_066	0.6109	2.06	0.07809	1.06	0.52		482	39	484	7.9	485	5	101		0.64	148	95	14
EST112_067	4.8495	1.45	0.3308	1	0.69		1738	19	1794	12.1	1842	16.1	106		0.43	901	384	365
EST112_068	0.5661	1.51	0.07354	1.01	0.67		447	25	456	5.5	457	4.4	102		1.02	791	809	79
EST112_069	0.6312	1.51	0.08044	1.01	0.67		489	25	497	5.9	499	4.8	102		0.17	934	161	83
EST112_071	1.4216	1.36	0.14863	0.81	0.6		910	22	898	8.1	893	6.8	98		0.4	345	137	160
EST112_072	1.5713	1.6	0.16414	0.85	0.53		912	28	959	9.9	980	7.8	107		0.26	342	91	63
EST112_073	0.5149	1.42	0.06603	0.82	0.57		474	26	422	4.9	412	3.3	87		0.01	1468	10	90
EST112_074	13.2738	1.34	0.50859	0.82	0.61		2736	17	2699	12.6	2651	17.8	97		0.3	222	66	68
EST112_075	4.0398	1.41	0.27022	0.83	0.59		1773	21	1642	11.4	1542	11.4	87		1.68	185	311	6
EST112_076	12.5928	1.35	0.49248	0.82	0.61		2702	18	2650	12.6	2581	17.5	96		2.21	139	308	37
EST112_077	3.4175	1.41	0.25646	0.83	0.59		1561	21	1508	11	1472	11	94		0.5	116	59	53
EST112_078	1.3872	1.52	0.14319	0.85	0.56		936	26	884	8.9	863	6.8	92		0.36	155	57	84
EST112_070	1.9069	1.59	0.18595	1.02	0.64		1053	25	1084	10.6	1099	10.3	104		0.98	135	133	34
EST112_079	1.8254	1.52	0.17312	1.01	0.66		1109	22	1055	9.9	1029	9.6	93		0.47	203	94	43
EST112_080	2.9423	1.53	0.24057	1.01	0.66		1399	22	1393	11.5	1390	12.7	99		0.59	121	72	37
EST112_081	0.6096	1.56	0.07803	1.01	0.65		479	26	483	6	484	4.7	101		0.33	399	130	36
EST112_082	0.6263	1.64	0.07912	1.01	0.62		509	28	494	6.4	491	4.8	97		0.69	431	298	43
EST112_083	3.4799	1.64	0.2607	1.03	0.63		1565	24	1523	12.8	1493	13.8	95		0.86	43	37	15
EST112_084	1.9345	1.53	0.18452	1.01	0.66		1097	23	1093	10.2	1092	10.1	99		0.27	347	95	74
EST112_085	1.8347	1.56	0.18199	1.01	0.65		1019	24	1058	10.2	1078	10	106		0.53	146	77	33
EST112_086	6.9993	1.55	0.38709	1.02	0.66		2114	20	2111	13.6	2109	18.4	100		0.45	44	20	22
EST112_087	0.5727	1.7	0.07367	1.02	0.6		468	30	460	6.3	458	4.5	98		0.5	298	149	27
EST112_088	1.9034	1.56	0.18109	1.01	0.65		1102	24	1082	10.4	1073	10	97		0.39	228	89	49
EST112_089	11.005	1.52	0.48947	1.03	0.67		2489	19	2524	14.1	2568	21.7	103		0.51	55	28	35
EST112_090	2.0954	1.54	0.19661	1.01	0.65		1130	23	1147	10.5	1157	10.7	102		0.4	243	97	57
EST112_091	4.515	1.5	0.3037	1.01	0.67		1764	20	1734	12.4	1710	15.1	97		0.54	292	156	112
EST112_092	2.1562	1.49	0.20139	1	0.67		1139	22	1167	10.3	1183	10.8	104		0.32	271	86	64
EST112_093	0.5343	1.84	0.06855	1.04	0.56		474	34	435	6.5	427	4.3	90		0.91	308	280	28
EST112_094	9.7325	1.51	0.40003	1.02	0.68		2621	18	2410	13.8	2169	18.7	83		0.39	150	58	78
EST112_095	0.5276	1.65	0.06855	1.01	0.61		446	29	430	5.8	427	4.2	96		0.91	354	322	33
EST112_096	1.6546	1.82	0.1677	1.04	0.57		975	30	991	11.5	999	9.7	103		0.65	70	45	15
EST112_097	0.5499	1.57	0.07153	1.01	0.64		444	26	445	5.6	445	4.3	100		0.51	412	209	36
EST112_098	4.6878	1.49	0.30785	1	0.68		1808	20	1765	12.4	1730	15.2	96		0.94	168	158	71
EST112_099	0.6199	1.65	0.07932	1.01	0.61		480	29	490	6.4	492	4.8	103		0.91	687	627	73
EST112_100	1.8104	1.61	0.17627	1.02	0.63		1056	25	1049	10.5	1047	9.8	99		0.91	116	106	28
